# Supplementary material for: Strain-mediated type-I/type-II transition in MXene/Blue phosphorene van der Waals heterostructures for flexible optical/electronic devices
Source: Royal Society of Chemistry journal article supplement (doi:10.1039/c6tc04349f), 2016-12-08
Supplement: c6tc04349f1.pdf [file c6tc04349f1.pdf]

## ***Supplementary Information***

### **Strain-mediated Type-I/Type-II Transition in MXene/Blue Phosphorene van der Waals Heterostructures for Flexible Optical/Electronic Devices**

Zhonglu Guo<sup>1,2</sup>, Naihua Miao<sup>1,2</sup>, Jian Zhou<sup>1\*</sup>, Baisheng Sa<sup>1,3</sup>, Zhimei Sun<sup>1,2</sup>

<sup>1</sup>*School of Materials Science and Engineering, Beihang University, Beijing 100191, China*

<sup>2</sup>*Center for Integrated Computational Materials Engineering, International Research Institute for Multidisciplinary Science, Beihang University, Beijing 100191, China*

<sup>3</sup>*Multiscale Computational Materials Facility, College of Materials Science and Engineering, Fuzhou University, Fuzhou 350100, China*

Figure S1

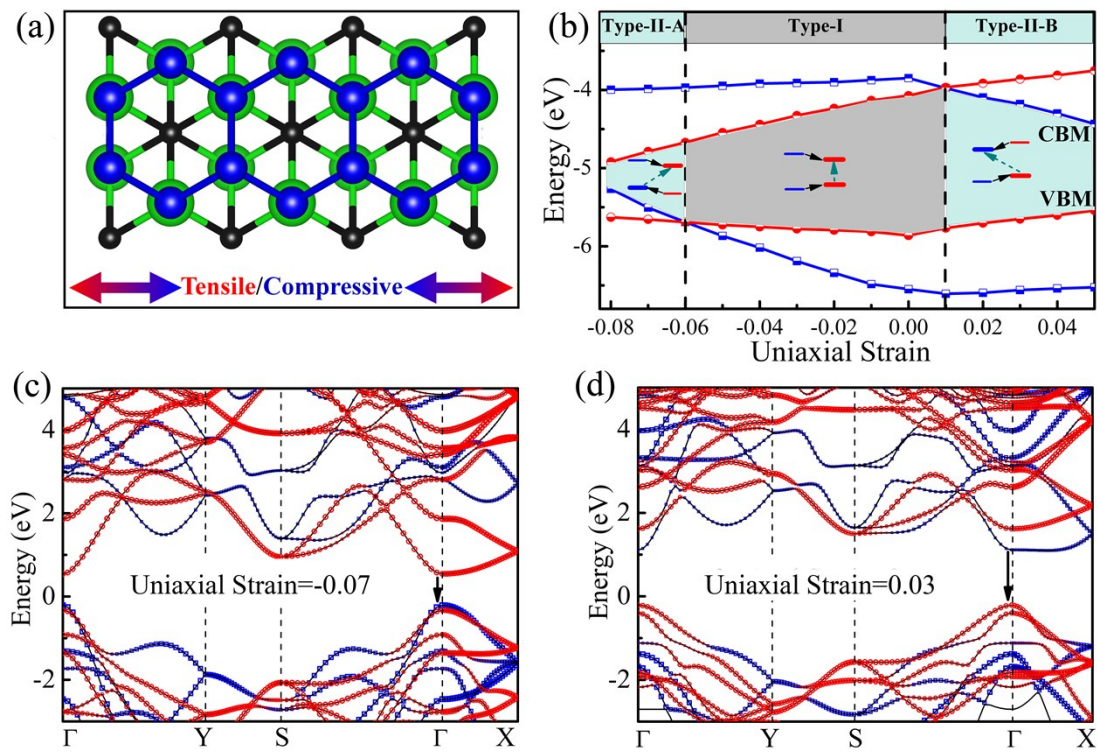

Figure S1 (a) Schematic drawing of the application of uniaxial strain. (b) The band edge positions of Zr<sub>2</sub>CO<sub>2</sub> and BlueP under various uniaxial strains ranging from -0.08 to 0.05, which are illustrated by the red half circle and blue half square, respectively. Calculated band structures of Zr<sub>2</sub>CO<sub>2</sub>/BlueP vdW heterostructure under uniaxial strains of (c) -0.05 and (d) 0.03 by HSE06, where the size of the red circles and blue squares in Figure S1c and d illustrate the projected weight of Zr<sub>2</sub>CO<sub>2</sub> and BlueP respectively.

It can be seen that the application of uniaxial strains can also realize the transition from type-I to type-II heterostructures and reverse the band edge positions of the modulated type-II heterostructures, which are consistent with the modulation effect of biaxial strain discussed in Figure 3 of the main text.
